1 Schrödinger’s range-shifting cat: analytic predictions for the  
2 effect of asymmetric environmental performance on climate  
3 change responses

4 J. Christopher D. Terry<sup>1,(corresponding)</sup>, Jacob D. O’Sullivan<sup>1</sup>, and A. G. Rossberg<sup>1</sup>

5 **Affiliations:** <sup>1</sup>School of Biological and Behavioural Sciences, Queen Mary University of  
6 London, Mile End Road, London, E1 4NS, United Kingdom **Contact:** c.terry@qmul.ac.uk

7 **Author Contributions:** JCDT lead the writing of the manuscript and built the simulation  
8 model. AGR derived the original analytic results. All authors contributed to interpreting the  
9 results and editing the manuscript.

10 **Abstract**

11 Analytic models for how species will respond to climate change can highlight key parameter  
12 dependencies. By mapping equations for population dynamics onto corresponding well-studied  
13 problems from quantum mechanics we derive analytical results for the frequently observed case  
14 of asymmetric environmental response curves. We derive expressions in terms of parameters  
15 representing climate velocity, dispersal rate, maximum growth rate, niche width, high-frequency  
16 climate variability and environmental performance curve skew for three key responses: 1) pop-  
17 ulation persistence, 2) lag between range displacement and climate displacement, 3) location of  
18 maximum population sensitivity. Surprisingly, under our model assumptions, the direction of  
19 performance curve asymmetry does not strongly contribute to either persistence or lags. Con-  
20 servation measures to support range-shifting populations may have most benefit near their envi-  
21 ronmental optimum or where the environmental dependence is shallow, irrespective of whether  
22 this is the ‘leading’ or ‘trailing’ edge. A metapopulation simulation corroborates our results.

## 23 1 Introduction

24 Climate change is driving range shifts of species across the world (Parmesan & Yohe 2003; Lenoir  
25 et al. 2020) making understanding the underlying ecological dynamics and drivers a key compo-  
26 nent of conservation efforts (Urban et al. 2016). For species with narrow environmental niches,  
27 their likelihood of survival will be determined by their relative rates of extirpation from sites  
28 at trailing edges and colonisation at leading edges (Kerr 2020). Range shifts are not instanta-  
29 neous, creating communities not at equilibrium with their climatic niche (Svenning & Sandel  
30 2013; Alexander et al. 2018; Rumpf et al. 2019; Lenoir et al. 2020). While species-distribution  
31 models (Elith & Leathwick 2009) can indicate the potential end state after climate change, dy-  
32 namic models are required to examine how a species' range may shift through time (Zurell et al.  
33 2009, Alexander et al. 2017). To meet this need, many modelling approaches have been applied,  
34 spanning the full breadth of possible trade-offs between model precision, realism and specificity  
35 (Levins 1966).

36 Large generalised spatially-explicit simulation models (Brooker et al. 2007; Urban et al. 2012;  
37 Lurgi et al. 2015; Thompson & Gonzalez 2017; Thompson & Fronhofer 2019) are able to flexibly  
38 capture many processes and have been highly informative. However, the complexity of these  
39 models makes systematic interrogation of conclusions drawn from particular parameter choices a  
40 challenge. Results can depend strongly on the underlying assumptions of the model (Zurell et al.  
41 2016). Moving-habitat integro-differential equation models (Zhou & Kot 2011; Kot & Phillips  
42 2015; Harsch et al. 2017; Hurford et al. 2019), which include a continuous spatial element and  
43 discrete time, can capture many nuances of dispersal processes and are somewhat analytically  
44 tractable (Kot & Phillips 2015). However, conclusions are still largely restricted to inspection of  
45 simulation results.

46 To complement these more specific models, there remains a strong need for fundamental  
47 theory to identify critical determinants of climate change responses. Purely analytic models pro-  
48 vide another perspective to the problem, providing an 'all-else-equal' baseline for consideration.  
49 To address this need, partial differential equation models building on well-established reaction-  
50 diffusion equation models (Cantrell & Cosner 2003) for invasive species and gene spread (Fisher  
51 1937; Skellam 1951; Hastings et al. 2005), have been applied to climate change scenarios (Pease

52 et al. 1989; Potapov & Lewis 2004; Berestycki et al. 2009; Li et al. 2014). This work has shown  
53 the critical rate of climate change that a species can survive to be a function of dispersal rate and  
54 population growth rate from rare, allowing direct comparison with data (Leroux et al. 2013).

55 However, to date, analytic models have been restricted to simple representations of species  
56 performance across environments. In particular, the functional dependence of the species' intrinsic  
57 growth rate on its environment, i.e. the environmental performance curve (EPC), is assumed  
58 to be symmetric. It is widely appreciated that most species show highly asymmetric environmen-  
59 tal responses (Savage et al. 2004), for example a gradual increase up to an optimum followed by  
60 a sharp decline. Disparities in environmental sensitivity between trailing and leading range edges  
61 may be expected to influence range-shift dynamics. For example, using a numerical approach,  
62 Hurford et al. (2019) demonstrated a case where the EPC asymmetry and dispersal interact to  
63 cause divergent effects depending on the direction of the asymmetry. Further, these asymmetries  
64 may be particularly relevant when underlying climatic variability is considered (Nadeau et al.  
65 2017).

66 Here, we extend previous analytic theory to incorporate asymmetric environmental depen-  
67 dence and directly investigate the impact of asymmetry on three key responses: likelihood of  
68 persistence, range-shift lag and the location of peak sensitivity to conservation interventions. We  
69 do this by re-formulating the species-movement problem as a Schrödinger equation, unlocking  
70 mathematical results from the quantum mechanics literature. We then corroborate these results  
71 in a simulation exhibiting complex dynamics.

## 72 2 Analytic Theory

### 73 2.1 Setting and specification of core model

74 For simplicity we only outline the mathematical derivations here. Full details are given in SI  
75 1 and SI 2 is an evaluated Mathematica notebook to replicate our analysis. Throughout, we  
76 assume a single spatial dimension ( $x$ ) that spans a linear gradient in an environmental variable  
77  $E$ , where initially  $E = x$ . Our  $E$  could represent any environmental variable, but is most  
78 easily conceptualised as an average temperature. Climate change is introduced by a linear time  
79 dependence of  $E$ :  $E_{x,t} = x - vt$ , where  $v$  is the rate of change in  $E$ . Hence, the location where  
80  $E = 0$ , moves with velocity  $v$ . In a warming scenario,  $x$  could be distance from a Pole or to a  
81 mountain peak and  $v$  would be negative. The correspondence between space and  $E$  means that  
82  $v$  can also be interpreted as a ‘climate velocity’ of dimensions of Length  $\times$  Time<sup>-1</sup> (Brito-Morales  
83 et al. 2018).

84 A species’ local population growth rate, given the environment, is defined by an environmental  
85 performance curve (EPC) function  $g(E)$ . Following e.g. Fisher (1937), Pease et al. (1989) and  
86 Hastings et al. (2005), we model changes in the local population density  $b = b(x, t)$  of a species  
87 through time  $t$  at location  $x$ , including dispersal at a rate  $D$ , as

$$\frac{\partial b(x, t)}{\partial t} = g(E_{x,t})b(x, t) - cb(x, t)^2 + D\frac{\partial^2 b(x, t)}{\partial x^2}. \quad (1)$$

88 The effect of migration is incorporated via the final term of Eq. (1). The rate of net migration  
89 depends on the curvature of the population density to either side of the focal point. Populations  
90 near the peak of the biomass distribution (where the curvature is negative) lose population  
91 density to net-migration, while the edges of the distribution (where the curvature is positive)  
92 gain. The dispersal rate  $D$  is 1/2 times the mean squared displacement along  $x$  of a lineage per  
93 unit time and can related directly to the mean movement of individuals per generation (Kareiva  
94 & Shigesada 1983).

95 Central to our approach is a change of reference frame to track the region of suitable envi-  
96 ronment across space. We define  $y = x - vt$  and use  $y$  as our principal spatial variable (Fig. 1).  
97 This allows us to examine the distribution  $u(y, t) = u(x - vt, t) = b(x, t)$  of the population in

98 a reference frame co-moving with the environment. Evaluation of the derivatives results in the  
 99 following partial differential equation for  $u(y, t)$ , equivalent to the equation for  $b(x, t)$  above:

$$\frac{\partial u(y, t)}{\partial t} = g(E_{y,t})u(y, t) - cu(y, t)^2 + D\frac{\partial^2 u(y, t)}{\partial y^2} + v\frac{\partial u(y, t)}{\partial y} \quad (2)$$

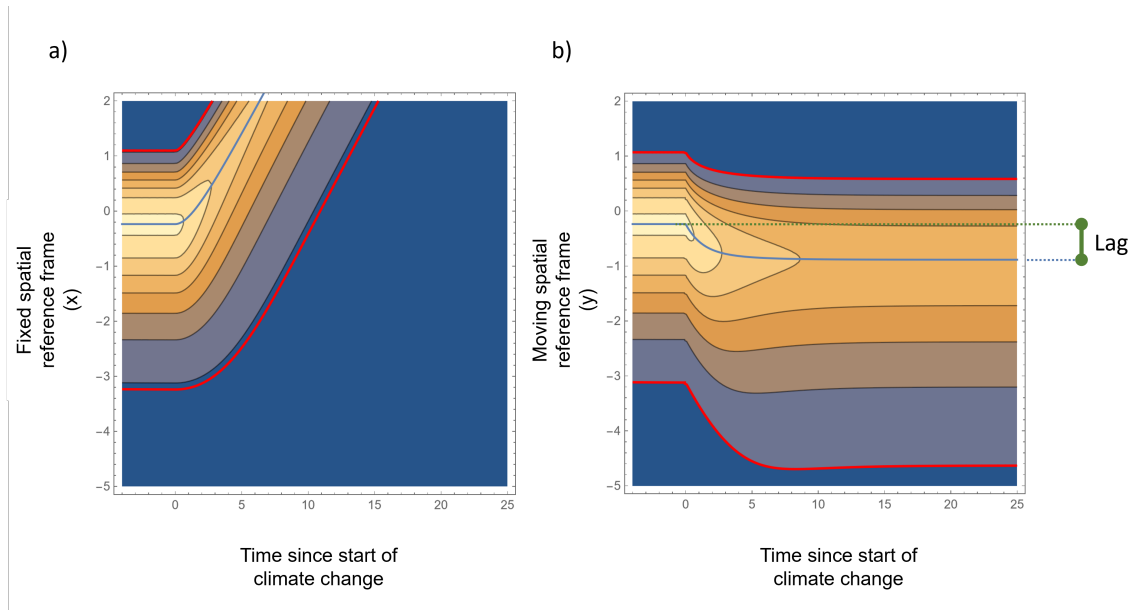

Figure 1: a) Example of movement of species range with climate change under a fixed spatial reference frame ( $x$ ). Climate change rate ( $v$ ) is set to  $+0.45$  starting at  $t=0$ . Brightness of colour signifies population density, peak density is indicated by the central blue line. b) Species range through time under climate change in the moving reference frame ( $y$ ) - parameters are otherwise identical to a). With ongoing climate change, after a period of adjustment the population reaches a steady travelling wave state, with a lower overall population density and a constant lag behind the moving climate. Parameter values are listed in the Mathematica supplement.

|                              | Term                  | Meaning                                                                                          |                                                                                          |
|------------------------------|-----------------------|--------------------------------------------------------------------------------------------------|------------------------------------------------------------------------------------------|
| <i>Core Model parameters</i> | $x$                   | Spatial coordinate                                                                               |                                                                                          |
|                              | $v$                   | Rate of climate change                                                                           |                                                                                          |
|                              | $y$                   | Spatial location, reference frame moving with climate change $y = x - vt$                        |                                                                                          |
|                              | $b(x, t)$             | Population density at point $x$ and time $t$ (fixed reference)                                   |                                                                                          |
|                              | $u(y, t)$             | Population density at point $y$ and time $t$ (moving reference)                                  |                                                                                          |
|                              | $E$                   | Environmental variable                                                                           |                                                                                          |
|                              | $g(E)$                | Environmental performance curve (EPC) function describing local population growth rate given $E$ |                                                                                          |
|                              | $\psi(y)$             | Population distribution without climate change.                                                  |                                                                                          |
|                              | $\lambda$             | Population growth rate                                                                           |                                                                                          |
|                              | $\lambda_0$           | Population growth rate without climate change                                                    |                                                                                          |
|                              | $D$                   | Dispersal rate                                                                                   |                                                                                          |
|                              | $c$                   | Strength of density dependence                                                                   |                                                                                          |
|                              | <i>EPC parameters</i> | $w$                                                                                              | Niche width parameter                                                                    |
|                              |                       | $a$                                                                                              | Asymmetry of EPC                                                                         |
| $\phi$                       |                       | Environmental optimum, peak of $g()$                                                             |                                                                                          |
| $R_{max}$                    |                       | Growth rate at optimum                                                                           |                                                                                          |
| $\sigma$                     |                       | Standard deviation of temporal environmental variation                                           |                                                                                          |
| <i>Derived Values</i>        |                       | $v^*$                                                                                            | Critical rate of climate change at which the population cannot persist ( $\lambda = 0$ ) |
|                              | $\Delta^{space}$      | Lag in space between total climate displacement and displacement of population at steady state   |                                                                                          |
|                              | $\Delta^{time}$       | Lag in time between changes in the environmental values and the population density               |                                                                                          |
|                              | $S_{max}$             | Location of peak sensitivity of $\lambda$ , relative to optimum                                  |                                                                                          |

Table 1: Summary of parameters and variables used in the analytic theory.

## 100 2.2 Approximate model general solution using a Schrödinger Equation

101 For vulnerable populations - that is, populations that are close to extirpation - an approximate  
102 solution of Eqs. (1) and (2) can be constructed if the spatial distribution of the population prior  
103 to climate change ( $v = 0$ ) is either known or has been computed from either Eqs. (1) or (2)  
104 (SI 1). We denote this spatial distribution with a function  $\psi(y)$ , that describes the *shape* of the  
105 population distribution across space.

106 By focusing on vulnerable species the problem simplifies, because when populations are low  
107 the quadratic terms in Eq. (2) describing density-dependencies will generally be small compared

108 to both the dispersal terms and the term containing the environmental performance curve  $g(\cdot)$ ,  
109 with the latter two mostly balancing each other (S1.3). The effect of density dependence can then  
110 be taken into account as a small perturbation. As a result, the equilibrium solution  $u(y, t)$  will,  
111 up to a scaling factor, be very similar to the form that  $u(y, t)$  would attain while the population  
112 was growing from initial low abundance.

113 Mathematically, we therefore define  $\psi(y)$  not directly as the solution of Eq. (2) for  $v = 0$   
114 but as the solution of the corresponding equation without density dependence for a population  
115 growing from low abundance with the maximum feasible growth rate  $\lambda_0$ :

$$\lambda_0 \psi = g(y) \psi + D \frac{d^2 \psi}{dy^2}. \quad (3)$$

116 This equation defines  $\psi(y)$  up to a constant factor that does not matter for the following.

117 We show in S1.2 and S1.3 that from  $\psi(y)$  and  $\lambda_0$  an approximation of the species' response  
118 to climate change at any given velocity  $v$  can be obtained without solving another differential  
119 equation. Instead, the populations' approximate distribution in the presence of climate change  
120 (with velocity  $v$ ) is

$$b(x, t) = U e^{-v(x-vt)/(2D)} \psi(x - vt), \quad (4)$$

121 where  $U$  is a scaling parameter given by

$$U = \frac{\lambda \int_{-\infty}^{\infty} \psi^2 dy}{c \int_{-\infty}^{\infty} e^{-vy/(2D)} \psi^3 dy}, \quad (5)$$

122 and

$$\lambda = \lambda_0 - \frac{v^2}{4D}. \quad (6)$$

123 Under our assumptions, Eq (4) holds up to a relative error of the magnitude of  $\lambda/\max_y g(y)$ .  
124 The population's actual distribution prior to climate change is a good first approximation of  $\psi(y)$   
125 ( $= \psi(x)$ ) and can be used in place of  $\psi$  above. Alternatively, Eq. (3) can be solved numerically.  
126 Here, however, we make use of another possibility. This draws on the formal equivalence between

127 Eq. (3) and the time-independent Schrödinger equation (Schrödinger, 1926) for the wave function  
128  $\psi$  of a particle moving in a one-dimensional energy potential  $V(y)$ :

$$E\psi = V(y)\psi - \frac{\hbar^2}{2m} \frac{d^2\psi}{dy^2}. \quad (7)$$

129 In this equation,  $E$  denotes the total energy,  $m$  is the particle's mass and  $\hbar$  is a constant.  
130 Comparing terms, one sees that the potential energy  $V(y)$  corresponds to the environmental  
131 performance function  $g(\cdot)$  (with a sign flip). The final term describes the kinetic energy of the  
132 particle and corresponds to the dispersal term in Eq. (3). The value of these correspondences  
133 come from the fact that Eq. (7) has been studied extensively in quantum physics. This has led  
134 to a strong body of intuition about the nature of the solutions of the eigenvalue problem given  
135 by Eq. (7) and the discovery of many functional forms for  $V(y)$  for which closed-form solutions  
136 can be derived (Mattis 1993).

137 Importantly, we are not adopting an interpretation of population density as a quantum me-  
138 chanical wave function. Our results are distinct to the fundamental uncertainty aspects of quan-  
139 tum mechanics that may be familiar to some readers, although previous authors have suggested  
140 that those could have ecological applications too (Bull 2015; Real et al. 2017). Rather, we  
141 are transferring existing mathematical results from the quantum mechanics literature. We only  
142 consider real valued-solutions and so our problem is closely related to classical reaction-diffusion  
143 models (Nagasawa 1993).

### 144 **2.3 Representing Environmental Performance Curves**

145 In our model the function  $g(E)$  describes how the local intrinsic growth rate of a population (i.e.  
146 without dispersal effects) depends on environmental conditions. It could be any function that is  
147 negative as  $E$  becomes very large or very small. However, by selecting one of the many functions  
148 for which Eq. (7) has been solved analytically (for an accessible list see [http://wikipedia.org/  
149 wiki/List\\_of\\_quantum-mechanical\\_systems\\_with\\_analytical\\_solutions](http://wikipedia.org/wiki/List_of_quantum-mechanical_systems_with_analytical_solutions)) considerable progress  
150 can be made.

151 An asymmetric environmental performance curve (Fig 2b,c) can be defined in analogy to the  
152 Morse potential (Morse 1929) function



$$g_{Mor}(E) = R_{max} \left( 1 - \frac{(1 - e^{a(E - \phi)})^2}{a^2 w^2} \right), \quad (8)$$

153 where  $R_{max}$  is the local intrinsic growth rate of the species at the environmental optimum  $E = \phi$ ,  
154  $w$  is a niche width parameter and  $a$  is a non-zero asymmetry parameter. For simplicity we will  
155 assume the environmental optimum to be at  $\phi = 0$  throughout. We assume that  $|aw| < 1$   
156 throughout, which assures that both very high and very low values of  $E$  lead to negative growth  
157 rates  $g_{Mor}(E)$ . EPC  $g(E)$  provided in other functional forms are best approximated by  $g_{Mor}(E)$   
158 by matching the first three derivatives at the point  $\phi$  of maximum performance ( $g'(\phi) = 0$ ). This  
159 is achieved by setting  $w = (2R_{max}/|g''(\phi)|)^{1/2}$  and  $a = g'''(\phi)/3g''(\phi)$ .

160 Care is needed when referring to skew direction - a *positive* value of  $a$  leads to a ‘negative’  
161 or left-tailed skew (Fig 2b,c) in terms of  $E$ . Our  $E$  variable declines with climate change - if  
162  $E$  is a temperature variable, lower values are therefore warmer, and positive  $a$  values would  
163 be described as ‘warm-skewed’ because the heavy tail is to the warmer (more equatorial, lower  
164 elevation) side of the optimum (Hurford et al. 2019).

165 On top of these underlying functions, the effect of high-frequency temporal environmental  
166 variation can be modelled by convolving these curves with a probability density function that  
167 represents the environmental variation. When environmental variability is represented by a Gaus-  
168 sian distribution with standard deviation  $\sigma$ , the convolution with the Morse potential function  
169 Eq (8) maps onto a transformed Morse potential. In Fig 2d, we show the effect of introducing  
170 variability with  $\sigma = 1$  on the overall effective environmental performance curve: it softens the  
171 edges and shifts and flattens the peak of the performance curve (Ruel and Ayers 1999).

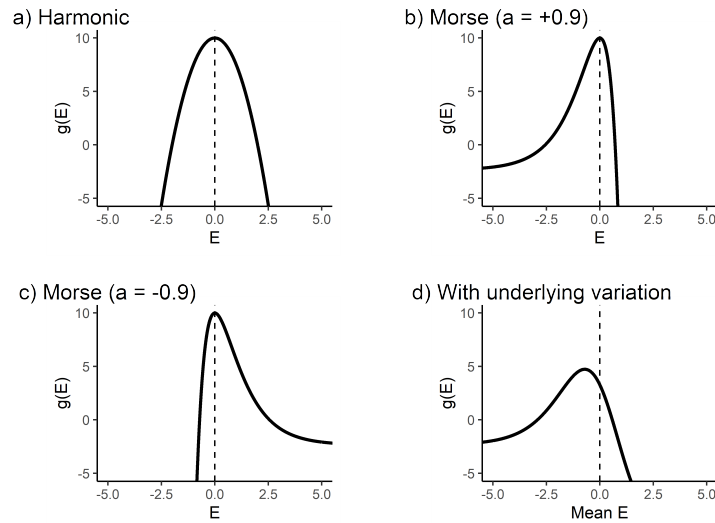

Figure 2: Illustration of environmental performance curves under different models that permit analytic solutions. In each case the species has an optimum  $\phi = 0$  and  $R_{max} = 10$  a) harmonic potential function,  $w = 2$ . b) Morse potential function, where  $a = +0.9$ ,  $w = 1$  c) Morse potential function  $a = -0.9$ ,  $w = 1$ , d) Morse potential function as ‘ $g(E)$ ’, but incorporating the effects of a variable  $E$ , (mean 0,  $\sigma = 1$ ,  $a = +0.9$ ,  $w = 1$ ). Note how with the peak of the curve has shifted with the introduction of this climate variability.

### 172 3 Analytic Results

173 We use our model to derive analytic predictions for how three response properties depend on key  
 174 parameters – 1) the capacity for species to sustain themselves under climate change, 2) the lag  
 175 between a species’ distribution and where it ‘should’ be if it kept pace with climate change, and  
 176 3) the location where conservation interventions would be most efficacious.

#### 177 3.1 Response 1: Critical speed of climate change

178 The sign of the low-density growth rate  $\lambda$  under climate change is crucial for a moving population  
 179 (Grainger et al. 2019). If positive, a population at low abundance will grow (despite climate  
 180 change), to the equilibrium state described by Eq. (4). If negative, the population will decline  
 181 to extinction. By Eq. (6), climate change is always detrimental to fitness. Remarkably, this fitness  
 182 decline is entirely independent of the form of the EPC  $g(E)$ . Also of interest is that the impact of  
 183 climate change rate on population fitness is quadratic, implying that linear extrapolations from

184 observations of slow change will not correctly predict the impact of faster changes.

185 Equation (6) can be rearranged to determine the critical speed of climate change ( $v^*$ ), at  
186 which a species can no longer keep up and will go extinct (i.e.  $\lambda = 0$ ):

$$v^* = \sqrt{4D\lambda_0}. \quad (9)$$

187 Alternatively, one can solve for  $D$  to identify the critical rate of dispersal that a species must  
188 exceed to maintain its population (Hastings et al. 2005; Leroux et al. 2013). Again, neither of  
189 these results depend on the shape of  $g()$ .

190 The shape of the performance curve does, however, influence the pre-climate change popula-  
191 tion growth rate ( $\lambda_0$ ). Using the asymmetric EPC defined above, we can obtain (S2.3) a relatively  
192 simple expression for the intrinsic population growth rate,

$$\lambda = R_{max} - \frac{v^2}{4D} - \frac{\sqrt{DR_{max}}}{w} + \frac{a^2D}{4}. \quad (10)$$

193 This is valid as long as  $D < 4R_{max}a^{-4}w^{-2}$  (S1.6).

194 The first three terms of Eq. (10) correspond to previously found conclusions about the impact  
195 of climate change in the case of a symmetric (quadratic) EPC (Pease et al. 1989). Consistent  
196 with intuition, the model predicts that greater maximum population growth rate increases fitness  
197 and that climate change is detrimental to population fitness. The effect of dispersal rate  $D$  is  
198 multifaceted – the second term shows how greater dispersal can offset the impact of faster climate  
199 change, but the third term shows a negative effect of greater dispersal due to losses from the  
200 central part of the population. This effect is mitigated by larger niche widths.

201 The fourth term predicts that asymmetry ( $a$ ) acts quadratically, and is therefore independent  
202 of skew direction – whether the long tail in performance is on the leading or trailing range edge  
203 is not relevant to population fitness. This follows naturally from the result that asymmetry only  
204 influences the baseline population fitness  $\lambda_0$ , which does not have any sense of directionality.  
205 Grouping the terms can identify  $\lambda_0 = R_{max} - (DR_{max})^{1/2}w^{-1} + a^2D/4$ , i.e. most of the pa-  
206 rameters in Eq. (10) contribute only to the  $\lambda_0$  component, not the response to climate change  
207 as such.

208 Similarly, high-frequency temporal variation impacts only the form of  $g()$ , and so can be  
209 shown not to alter the marginal impact of climate change in our model (Eqs. (6), (9)). That  
210 said,  $\sigma$  does impact the overall expression for  $\lambda$  in a complex manner (see S2.3.2). The marginal  
211 effect of increasing  $\sigma$  from a low value on  $\lambda$ ,

$$\left. \frac{d\lambda}{d\sigma} \right|_{\sigma=0} = \frac{a^2 \sqrt{DR_{max}}}{w} - \frac{2R_{max}}{w^2}, \quad (11)$$

212 is easier to interpret. Taking into account the condition  $D < 4R_{max}a^{-4}w^{-2}$  for Eq. (10),  
213 increasing variability will always lead to a reduction in growth rate. However, it shows that the  
214 marginal effect of temporal variation on fitness is dependent on a large number of model terms.  
215 The range width denominators confirm the intuition that temporal variation is most influential  
216 with narrow ranged species. Both dispersal and asymmetry in Eq. (8) effectively widen the  
217 niche and correspondingly reduce the negative impacts of environmental variation. Again, the  
218 direction (sign) of the asymmetry is not relevant since  $a$  enters quadratically.

### 219 **3.2 Response 2: Range shift lag behind climate change**

220 Since both dispersal and population growth take time, there is expected to be a measurable lag  
221 (in space and time) between the suitable climatic range and the distribution of a population  
222 (Alexander et al. 2018). With a constant rate of climate change, and assuming a species'  
223 population is able to sustain itself, it will eventually reach an equilibrium in coordinates co-  
224 moving with the changing climate. Even in an idealised model system like ours, there are  
225 multiple metrics that can be used to describe a species range in space (Yalcin & Leroux 2017).  
226 Here we measure lag in the moving reference frame between the pre-climate change peak of  
227 population density and the peak with climate change once it reaches the travelling wave stage  
228 (Fig 1).

229 Using the asymmetric EPC including the effect of temporal variation, we can derive expres-  
230 sions for these lags (S2). Focusing on the case where the rate of climate change  $v$  is relatively  
231 small ( $v \rightarrow 0$ ), the steady-state lag ( $\Delta$ ) in time becomes:

$$\Delta^{time} \rightarrow \frac{w}{2\sqrt{DR_{max}}} + a^2 \left( \frac{w^2}{2R_{max}} + \frac{\sigma^2 w}{4\sqrt{DR_{max}}} \right) \quad (12)$$

232 This lag in time can be converted to lag in space by multiplying by the velocity of climate  
233 change. If ‘lag’ is instead measured in terms of the centre of mass of the population’s distribution,  
234 identical results are obtained to lowest order in  $v$  and  $a$  (S2.4). Where there is no asymmetry  
235 ( $a = 0$ ), only the first term is relevant. The denominator reaffirms the intuition that lags are  
236 reduced by greater dispersal and larger maximum growth rates. The numerator shows that lags  
237 are greater with wider niche widths – the population is not forced to move as rapidly when a  
238 larger part of the environment is suitable.

239 From the second term of Eq. 12 it can be seen that the exact impact of  $a$  depends in a  
240 complex way on other parameters but responds only to the magnitude of asymmetry, not the  
241 sign. Overall, greater maximum growth rate  $R_{max}$  and greater dispersal  $D$  always decrease that  
242 lag and greater niche width  $w$ , asymmetry  $a$ , and climate variability always enhance it. The  
243 effect of climate variation  $\sigma$  is tied to the asymmetry of the EPC, with variation combining with  
244 asymmetry increasing effective niche width, while in the symmetric case  $\sigma$  has no effect.

### 245 **3.3 Response 3: Sensitivity to Conservation Actions**

246 Our model can be analysed to examine where interventions are most consequential for the overall  
247 population growth rate, and might therefore be of particular conservation priority. We do this by  
248 assessing the sensitivity of the overall population  $\lambda$  to local perturbations in growth rate across  
249 space. Note that we use the moving spatial reference frame  $y$  (and optimum  $\phi = 0$ ), so that  
250 locations are relative to the environmental optimum at each point in time as climate change  
251 progresses. This method is analogous to determining the most sensitive life-stage (e.g. Caswell  
252 2012, 2019), but substituting age by space. The sensitivity of  $\lambda$  is proportional to the product  
253 of the reproductive value and the abundance at each environment in the stable distribution.

254 Computing the shift of the peak sensitivity  $S_{max}$  relative to the value of  $y$  where the envi-  
255 ronment is optimal, we find

$$S_{max} = \frac{1}{a} \ln \left[ 1 - a^2 \sqrt{\frac{D}{4R_{max}}} \right] \approx -a \sqrt{\frac{D}{4R_{max}}}. \quad (13)$$

256 Remarkably, the shift  $S_{max}$  away from the optimum environment depends neither on the rate  
 257 nor direction of environmental change. In S1.5, we show that this independence on  $v$  is a highly  
 258 general result valid for any functional form of the EPC. For symmetric EPC, there is no shift at  
 259 all, but for our asymmetric EPC maximum sensitivity always occurs on the long-tail side of the  
 260 environmental optimum (Figure 3).

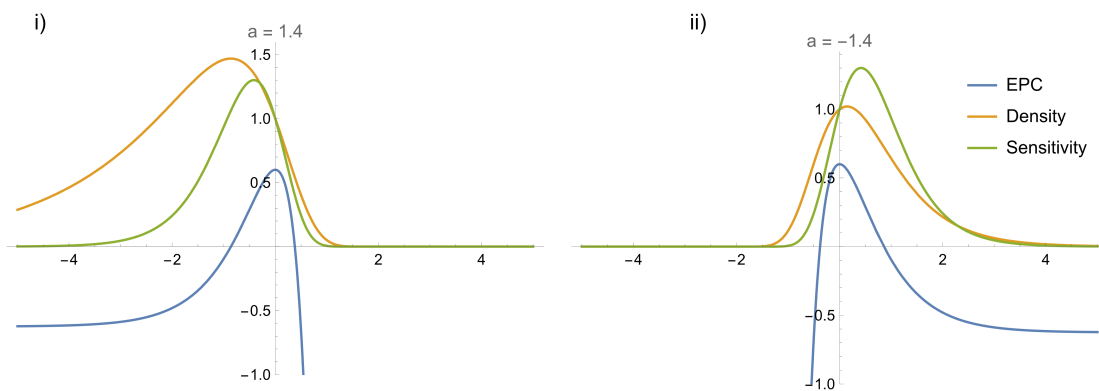

Figure 3: Distribution of sensitivity to intervention and population density at equilibrium with climate change. In both panels, the horizontal axis is in  $y$ , the species leading edge is to the right, and the trailing edge to the left. Apart from the asymmetry of the EPC, parameters are the same, only the direction of asymmetry varies. Horizontal axis =  $y$  (the moving reference frame) where  $0 = \phi$ , the species environmental optimum. Three quantities are plotted: the EPC function, showing environmental optima at  $y = 0$  (blue), the population density (orange,  $\psi$ , standardised to equal 1 at  $y = 0$ ), and the sensitivity to intervention (green, also scaled)

## 261 4 Comparison with simulations

262 To derive analytic results, our framework makes a number of simplifying assumptions. To test  
 263 the translatability of our predictions to more complex systems, we built a spatially-explicit  
 264 population model. Expanding on the continuous-time and continuous space analytic results, we  
 265 built this model to include randomness and discreteness in both space and time. Because of the

266 inherent challenges in estimating key parameters we focus on qualitative comparisons between  
267 our analytic predictions and the simulations, but show in SI 4 that quantitative predictions  
268 are of the correct order of magnitude. Where possible we use the same symbols for simulation  
269 and analytic parameters where they are similar, but note that they are not directly comparable  
270 because of differences in overall model structure.

## 271 4.1 Model Specification

272 Full details of our simulation model are given in SI 3. Briefly, we generated rectangular arenas  
273 with dimensions 40x10, each with 200 randomly located nodes connected to their nearest neigh-  
274 bours (Figure 4a). A single environmental variable  $E$  linearly increases along the  $x$ -axis of each  
275 arena from 0 to 40. Population dynamics of each species were modelled in discrete time and  
276 followed logistic growth with dispersal between nodes, where the intrinsic growth rate  $R_{max}$  de-  
277 pended on the current environment at that node through performance functions based on Eq (8),  
278 with  $R_{max} = 10$ ,  $w = 1$  and  $a = \pm 0.9$ ). To represent temporal environmental variability, for  
279 each set of 15 timesteps (which we refer to as a ‘year’) we added a value drawn from a Gaussian  
280 distribution (mean=0,  $\sigma = 0.5$ ) to all  $E$  values during that year. Immigration into neighbouring  
281 sites was determined by an exponential distance decay function, with dispersal rate chosen such  
282 that extinctions are possible once climate change is introduced.

283 We assembled 100 sets of species with either direction of environmental performance skew  
284 ( $a = +0.9$  or  $-0.9$ ). We did not test a symmetric environmental performance curve case, as it  
285 is not possible to standardise all aspects of the performance curve for a fair comparison. For  
286 each set, 100 species were generated with environmental optima ( $\phi$ ) each drawn from a uniform  
287 distribution between 20 and 30, maintaining a region of suitability throughout the simulation  
288 to mitigate possible edge effects. The arenas were seeded with initial colonists and the model  
289 integrated for 200 ‘years’ to fill their initial range. Species that at any point fell below a threshold  
290 biomass ( $10^{-6}$ ) across all nodes were considered extinct and removed.

291 We examined three response metrics that could be derived from both the simulation model  
292 and the analytic model, to assess if the pattern of parameter dependencies holds.

## 293 4.2 Critical rate of climate change

294 We sequentially simulated each assembled set of species under varying rates of climate change  
295 ( $v = 0$  to  $0.5$  in steps of  $0.05$ ) and identified the fraction of species that had fallen below 1% of  
296 their starting total population size at the end of 50 ‘years’ of climate change. In line with our  
297 expectations, there was a relatively precipitous decline in survival chance. Both  $a = +0.9$  and  
298  $-0.9$  showed very similar responses (Figure 4bi). We confirmed that the asymmetry parameter  
299 was indeed impacting  $v^*$  with trials of  $a = -0.7, 0.3, 0.3$  and  $0.7$  (SI 3). We fit a generalised linear  
300 mixed-effects model that included as main predictors  $v, a$ , their interactions and assemblage as  
301 a random effect to estimate  $v_{50}$ , the  $v$  at which the 50% of species go extinct. When left-skewed  
302 ( $a = +0.9$ ),  $v_{50} = 0.292$ , while when right-skewed ( $a = -0.9$ ),  $v_{50} = 0.305$ .

## 303 4.3 Movement Lags

304 We tested the lag in movement of the centre of mass of the population distribution for each of  
305 the assemblies during climate change. We first assessed the starting location of the ‘centre of  
306 mass’ of each species before any climate change ( $m_{i,\text{start}}$ ) as the average  $x$ -coordinate of each  
307 node, weighted by the biomass of species  $i$  at each node, averaged over 20 years. We then ran  
308 70 years of climate change at  $v = 0.1$ , and measured the average lag in space ( $\bar{\Delta}_i^{\text{space}}$ ) for each  
309 species over the final 20 years:

$$\bar{\Delta}_i^{\text{space}} = \frac{1}{20} \sum_{t=51}^{70} (m_{i,\text{start}} + vt - m_{i,t}) \quad (14)$$

310 Overall,  $a = +0.9$  led to a marginally greater average spatial lag ( $0.618$ ) than  $a = -0.9$   
311 ( $0.467$ ), but this was small compared to the overall amount of variation in the simulations (Fig.  
312 4bii).

## 313 4.4 Location of Peak Sensitivity

314 Localised conservation interventions were represented by increasing the intrinsic growth rate by  
315 2 at all sites within an intervention window 1 spatial unit wide. This band was centred  $L$  spatial  
316 units in the  $x$ -dimension from the optimum of each species. Climate change was introduced at



317 a rate of  $v = 0.28$ , which in the absence of intervention would cause around half the species to  
318 go extinct. When climate change was introduced, the intervention window moved with it. The  
319 simulation of 50 years of climate change was repeated with values of  $L$  ranging from +3 to -3  
320 (in steps of 0.5) and the percentage increase in species surviving the climate change period with  
321 the conservation intervention, compared to simulations without the intervention was recorded.

322 In line with the analytic expectations, we found that the location where the sensitivity had  
323 the most impact depended on the direction of the skew of the asymmetry of the EPC (Fig. 4biii).  
324 Interventions were most efficacious at preventing extinctions when they were located away from  
325 the optimum on the shallow environmental sensitivity (long tail of the EPC) side of the moving  
326 range, regardless of whether this was the ‘leading’ or ‘trailing’ edge of the range.

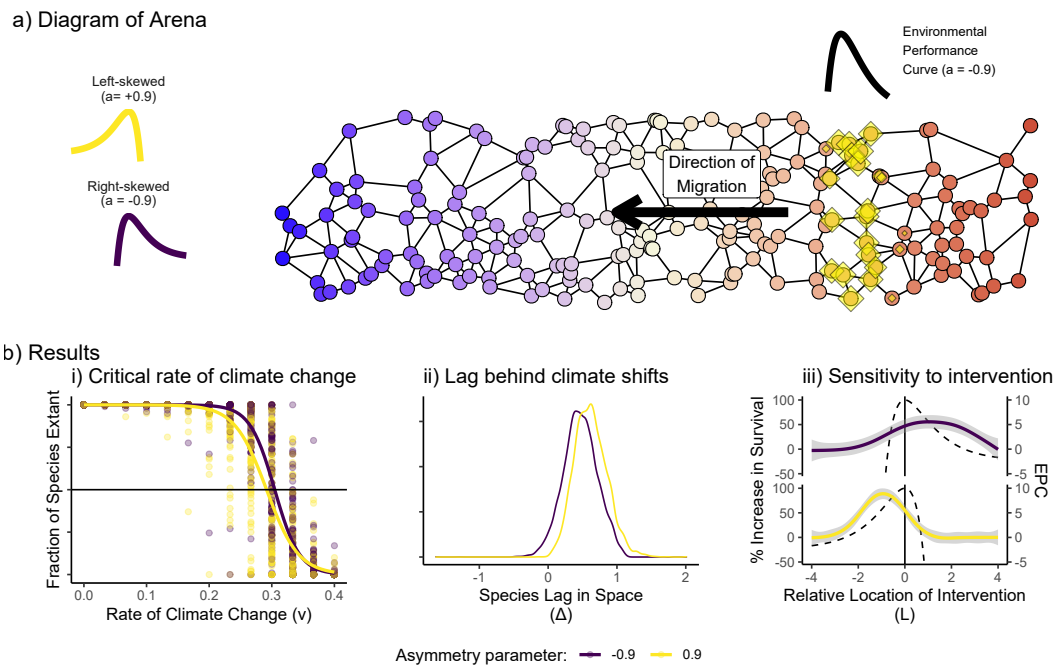

Figure 4: **Metapopulation simulations setting and results** a) Illustration of example virtual region of connected habitats the species inhabit in the simulation. Initial mean environmental values ( $E$ ) are given by the blue (low) to red (high) colouration. The size of the yellow diamonds illustrates the population density at each site. The environmental performance curve of the species (right-skewed,  $a = -0.9$ ) is drawn above. With climate change and an increasing underlying environmental variable, the species will have to shift its range leftwards. b) Numerical results from the simulations, partitioned and coloured by the direction of the skew of the EPC. i) The speed of climate change ( $v$ ) at which the proportion of species that are able to survive falls below 0.5. Lines are fitted binomial GLMs. ii) Density plots of the lag by which species fall behind the movement of climate at a moderate rate of climate change. iii) Observed increase in survival during climate change, at different locations of conservation intervention relative to each species' optimum. Solid coloured lines are GAMs fit through simulation results with 95% confidence intervals. Black dashed lines illustrate the environmental performance curves for reference. Peak efficacy aligns with the long tail of the environmental performance curve in both cases. For all three responses, the qualitative predictions of our analytic model are supported.

## 327 5 Discussion

328 Our results shed new light on how the shape of a species environmental niche and other key  
 329 drivers may impact responses to climate change. Our finding that while the extent of asymmetry  
 330 is potentially highly influential, the *direction* of skew is not relevant to either the likelihood of  
 331 population persistence or the range shift lag in our model is particularly surprising. Meta-

332 analyses of the rates of species range shifts have not identified strong trait or taxonomic signals,  
333 instead identifying range size and habitat breadth as the most informative predictors (Maclean  
334 & Beissinger 2017; Lenoir et al. 2020). If it is assumed that the direction of environmental  
335 performance asymmetry is linked to taxonomy, this would align with our results, however data  
336 specifying environmental performance curves is not presently available to conduct strong tests.

337 In physics, beyond the simplest case of the movement of a hydrogen atom in a vacuum, the  
338 complexities of multi-body problems limit the resolution with which predictions can be made.  
339 The same is true in ecology, and there are a large number of additional processes including  
340 species interactions, evolution, demography and environmental heterogeneity that will influence  
341 the observed dynamics (Urban et al. 2016). Analytic calculations will struggle to concurrently  
342 include the full diversity of processes that simulation models can achieve, and certain features  
343 pose particular challenges, for example heavy-tailed dispersal models that do not have moment-  
344 generating functions (Liu & Kot 2019). Nonetheless, the expansion of the analytic theory is  
345 fundamental to building a foundation of expectations for how the natural world will react.

346 Using our model, we demonstrated that interventions will have the greatest benefit on a  
347 rare range shifting species when located somewhat near the centre of the range, in the region  
348 corresponding to the long-tail of an asymmetric performance response. The result is consistent  
349 regardless of whether this region is towards the leading or trailing edge of the at-risk species'  
350 range. This conclusion is somewhat different to discussions about whether it is most helpful to  
351 support a species at its trailing edge (where it is at risk of imminent disappearance) or towards  
352 its leading edge (where assisted translocation is possible) and could form a possible rule-of-thumb  
353 when information is sparse.

## 354 **5.1 Applicability and Scope**

355 In principle, the parameters in the analytic model could be directly measured for natural pop-  
356 ulations (e.g. Leroux et al. 2013). However, measuring dispersal rates remains challenging,  
357 especially given the importance of rare long distance events (Kerr 2020). The predictability  
358 of dispersal and colonisation rate is limited even under tightly controlled experimental condi-  
359 tions (Melbourne & Hastings 2009) leading to hard limits to the accuracy of any direct model

360 prediction.

361 In our analysis, we interpreted  $b()$  as denoting a population density (individuals per unit area).  
362 However, one can instead interpret  $b()$  as the density of patches occupied (occupied patches per  
363 unit area), in the spirit of metapopulation modelling introduced by Levins (1969). This second  
364 interpretation may lead to a closer alignment between the assumptions of the model and empirical  
365 realities, as well as being more directly amenable to empirical verification or parameterisation  
366 using grid-cell occupancy data.

367 An important step in the derivation of our analytic results is the focus on species that are  
368 close to their extinction threshold. This allows the impact of density dependence to be as-  
369 sumed minimal and the application of perturbation theory. However, a steady state of a system  
370 such as Eq. (2) can broadly be achieved in two ways - either through high dispersal and low  
371 density-dependence, or through higher density-dependence and much lower influence of dispersal  
372 on growth rate. We examined species with minimal density-dependence, and therefore disper-  
373 sal terms will strongly influence local growth rates, including a not-insignificant reduction in  
374 population density in central areas due to emmigration. Our model is therefore likely most  
375 directly applicable at local scales where mass effects are more significant than occasional rare  
376 long-distance dispersal events.

377 This context is helpful to understand why our findings contrast with a previous modelling  
378 result. Hurford et al. (2019) found through simulations of an integro-differential equation model  
379 that positively skewed EPCs were associated with reduced lags compared to negatively skewed  
380 EPCs. Hurford et al. attributed this result to increased immigration into newly suitable areas  
381 from high-density populations near the leading edge. A key difference between our assumptions  
382 that may explain the discordance is that we focus on species close to an extinction threshold,  
383 while in Hurford et al.'s model extinctions do not occur.

## 384 5.2 Limitations and extensions

385 We base our results around the properties of a stable travelling wave and use the toolbox of  
386 quantum physics to precisely describe its motion. Our analytic framework is therefore orientated  
387 around long-term equilibrium solutions. Yet, there is considerable scope for the analysis of

388 transient dynamics following the start of the perturbation (in this case climate change), which  
389 may be more representative of available ecological observations (Hastings 2016). While our work  
390 significantly extends the scope of analytic theory in this field, there remain many further processes  
391 that are not directly considered. Our approach to modelling temporal variability effectively only  
392 modifies the underlying growth curve. It therefore only indirectly captures the impact of discrete  
393 stochastic events, that can be highly influential over short time frames relevant to contemporary  
394 climate change responses.

395 Further, neither our analytic model nor simulations explicitly include interactions between  
396 species precluding potential ‘box-car effects’, where competitive interactions slow the rate of  
397 advance (Urban et al. 2012; Legault et al. 2020), or the potential for extirpation from areas due to  
398 the climate-driven arrival of new species. Although the shape of the environmental performance  
399 could be attributed to indirect biotic as well as direct influences of the environment, this would  
400 not necessarily capture the complexities of interaction with other species, particularly when  
401 climate variability is considered (Terry et al. 2022). Models for interacting species within the  
402 reaction-diffusion framework have been developed (Cantrell & Cosner 2003, Potapov and Lewis  
403 2014) and incorporating interactions within a moving-environment framework is an interesting  
404 future avenue of research. Lastly, our model assumes fixed species traits, but species have the  
405 potential to adapt their traits to changing climates through plasticity or evolution (Hoffmann &  
406 Sgrò 2011). Trait adaptation can be built directly into the partial differential equation framework  
407 (Pease et al. 1989, Chevin et al. 2010) and represents a further promising area for further work.

### 408 **5.3 Conclusion**

409 Although spatial partial differential equation models have a long pedigree within ecology (Fisher  
410 1937; Hastings et al. 2005), our results show how rich seams of results remain to be harnessed  
411 to generate fresh ecological perspectives and more detailed baseline expectations. Our focus on  
412 the special - but critically important - case of species close to extirpation allows a simplification  
413 to an essentially linear problem and the incorporation of knowledge from other disciplines that  
414 can bring new and surprising analytical insight.

## 415 Acknowledgements

416 All authors were funded by NERC grant NE/T003510/1 ('Mechanisms and prediction of large-  
417 scale ecological responses to environmental change').

## 418 Data accessibility statement

419 This paper uses no empirical data. All code used (R and Mathematica) and simulation results are  
420 publicly available at [https://github.com/jcdterry/AnalyticRangeShift\\_Public](https://github.com/jcdterry/AnalyticRangeShift_Public) and should  
421 the manuscript be accepted will be archived in an appropriate public repository (Zenodo).

## 422 References

423 Alexander, J.M., Chalmandrier, L., Lenoir, J., Burgess, T.I., Essl, F., Haider, S., et al. (2018).  
424 Lags in the response of mountain plant communities to climate change. *Glob. Change Biol.*, 24,  
425 563–579.

426 Berestycki, H., Diekmann, O., Nagelkerke, C.J. & Zegeling, P.A. (2009). Can a species keep  
427 pace with a shifting climate? *Bull. Math. Biol.*, 71, 399–429.

428 Brito-Morales, I., García Molinos, J., Schoeman, D.S., Burrows, M.T., Poloczanska, E.S.,  
429 Brown, C.J., et al. (2018). Climate Velocity Can Inform Conservation in a Warming World.  
430 *Trends Ecol. Evol.*, 33, 441–457.

431 Brooker, R.W., Travis, J.M.J., Clark, E.J. & Dytham, C. (2007). Modelling species' range  
432 shifts in a changing climate: The impacts of biotic interactions, dispersal distance and the rate  
433 of climate change. *J. Theor. Biol.*, 245, 59–65.

434 Bull, J.W. (2015). Quantum Conservation Biology: A New Ecological Tool. *Conserv. Lett.*,  
435 8, 227–229.

436 Cantrell, R.S. & Cosner, C. (2003). *Spatial Ecology via Reaction-Diffusion Equations*. Wiley  
437 series in mathematical and computational biology. John Wiley & Sons Ltd.

438 Caswell, H. (2012). Matrix models and sensitivity analysis of populations classified by age  
439 and stage: a vec-permutation matrix approach. *Theor. Ecol.*, 5, 403–417.

440 Caswell, H. (2019). Introduction: Sensitivity Analysis – What and Why? In: *Sensitivity*

- 441 Analysis: Matrix Methods in Demography and Ecology, Demographic Research Monographs  
442 (ed. Caswell, H.). Springer International Publishing, Cham, pp. 3–12.
- 443 Chevin, L.-M., Lande, R. & Mace, G.M. (2010). Adaptation, Plasticity, and Extinction in a  
444 Changing Environment: Towards a Predictive Theory. *PLoS Biol*, 8, e1000357.
- 445 Elith, J. & Leathwick, J.R. (2009). Species distribution models: Ecological explanation and  
446 prediction across space and time. *Annu. Rev. Ecol. Evol. Syst.*, 40, 677–697.
- 447 Fisher, R.A. (1937). THE WAVE OF ADVANCE OF ADVANTAGEOUS GENES. *Ann.*  
448 *Eugen.*, 7, 355:369.
- 449 Grainger, T.N., Levine, J.M. & Gilbert, B. (2019). The Invasion Criterion: A Common  
450 Currency for Ecological Research. *Trends Ecol. Evol.*, 34, 925–935.
- 451 Harsch, M.A., Phillips, A., Zhou, Y., Leung, M.R., Rinnan, D.S. & Kot, M. (2017). Moving  
452 forward: insights and applications of moving-habitat models for climate change ecology. *J. Ecol.*,  
453 105, 1169–1181.
- 454 Hastings, A. (2016). Timescales and the management of ecological systems. *Proc. Natl.*  
455 *Acad. Sci.*, 113, 14568–14573.
- 456 Hastings, A., Cuddington, K., Davies, K.F., Dugaw, C.J., Elmendorf, S., Freestone, A., et al.  
457 (2005). The spatial spread of invasions: New developments in theory and evidence. *Ecol. Lett.*,  
458 8, 91–101.
- 459 Hoffmann, A.A. & Sgrò, C.M. (2011). Climate change and evolutionary adaptation. *Nature*,  
460 470, 479–485.
- 461 Hurford, A., Cobbold, C.A. & Molnár, P.K. (2019). Skewed temperature dependence affects  
462 range and abundance in a warming world. *Proc. R. Soc. B Biol. Sci.*, 286, 20191157.
- 463 Kareiva, P. & Shigesada, N. (1983). Analyzing insect movement as a correlated random walk.  
464 *Oecologia*, 56, 234–238.
- 465 Kerr, J.T. (2020). Racing against change: Understanding dispersal and persistence to improve  
466 species' conservation prospects. *Proc. R. Soc. B Biol. Sci.*, 287, 20202061.
- 467 Kot, M. & Phillips, A. (2015). Bounds for the critical speed of climate-driven moving-habitat  
468 models. *Math. Biosci.*, 262, 65–72.
- 469 Legault, G., Bitters, M.E., Hastings, A. & Melbourne, B.A. (2020). Interspecific competition  
470 slows range expansion and shapes range boundaries. *Proc. Natl. Acad. Sci.*, 117, 26854–26860.

- 471 Lenoir, J., Bertrand, R., Comte, L., Bourgeaud, L., Hattab, T., Muriene, J., et al. (2020).  
472 Species better track climate warming in the oceans than on land. *Nat. Ecol. Evol.*, 4, 1044–1059.
- 473 Leroux, S.J., Larrivé, M., Boucher-Lalonde, V., Hurford, A., Zuloaga, J., Kerr, J.T., et al.  
474 (2013). Mechanistic models for the spatial spread of species under climate change. *Ecol. Appl.*,  
475 23, 815–828.
- 476 Levins, R. (1966). The strategy of model building in population biology. *Am. Nat.*, 54,  
477 421–431.
- 478 Levins, R. (1969). Some Demographic and Genetic Consequences of Environmental Hetero-  
479 geneity for Biological Control. *Bull. Entomol. Soc. Am.*, 15, 237–240.
- 480 Li, B., Bewick, S., Shang, J.I.N. & Fagan, W.F. (2014). PERSISTENCE AND SPREAD OF  
481 A SPECIES WITH A SHIFTING HABITAT EDGE. *SIAM J. Appl. Math.*, 74, 1397–1417.
- 482 Liu, B.R. & Kot, M. (2019). Accelerating invasions and the asymptotics of fat-tailed dispersal.  
483 *J. Theor. Biol.*, 471, 22–41.
- 484 Lurgi, M., Brook, B.W., Saltré, F. & Fordham, D.A. (2015). Modelling range dynamics under  
485 global change: Which framework and why? *Methods Ecol. Evol.*, 6, 247–256.
- 486 MacLean, S.A. & Beissinger, S.R. (2017). Species' traits as predictors of range shifts under  
487 contemporary climate change: A review and meta-analysis. *Glob. Change Biol.*, 23, 4094–4105.
- 488 Mattis, D.C. (1993). *The Many-Body Problem: An Encyclopedia of Exactly Solved Models*  
489 *in One Dimension*(3rd Printing with Revisions and Corrections). WORLD SCIENTIFIC.
- 490 Melbourne, B.A. & Hastings, A. (2009). Highly Variable Spread Rates in Replicated Biolog-  
491 ical Invasions: Fundamental Limits to Predictability. *Science*, 325, 1536–1539.
- 492 Morse, P.M. (1929). Diatomic Molecules According to the Wave Mechanics. II. Vibrational  
493 Levels. *Phys. Rev.*, 34, 57–64.
- 494 Nadeau, C.P., Urban, M.C. & Bridle, J.R. (2017). Climates Past, Present, and Yet-to-Come  
495 Shape Climate Change Vulnerabilities. *Trends Ecol. Evol.*, 32, 786–800.
- 496 Nagasawa, M. (1993). Equivalence of Diffusion and Schrödinger Equations. In: *Schrödinger*  
497 *Equations and Diffusion Theory, Monographs in Mathematics* (ed. Nagasawa, M.). Birkhäuser,  
498 Basel, pp. 89–114.
- 499 Parmesan, C. & Yohe, G. (2003). A globally coherent fingerprint of climate change. *Nature*,  
500 421, 37–42.



- 501 Potapov, A.B. & Lewis, M.A. (2004). Climate and competition: The effect of moving range  
502 boundaries on habitat invasibility. *Bull. Math. Biol.*, 66, 975–1008.
- 503 Real, R., Márcia Barbosa, A. & Bull, J.W. (2017). Species distributions, quantum theory,  
504 and the enhancement of biodiversity measures. *Syst. Biol.*, 66, 453–462.
- 505 Ruel, J.J. & Ayres, M.P. (1999). Jensen’s inequality predicts effects of environmental varia-  
506 tion. *Trends Ecol. Evol.*, 14, 361–366.
- 507 Rumpf, S.B., Hülber, K., Wessely, J., Willner, W., Moser, D., Gattringer, A., et al. (2019).  
508 Extinction debts and colonization credits of non-forest plants in the European Alps. *Nat. Com-  
509 mun.*, 10, 4293.
- 510 Savage, V.M., Gillooly, J.F., Brown, J.H., West, G.B. & Charnov, E.L. (2004). Effects of  
511 body size and temperature on population growth. *Am. Nat.*, 163, 429–441.
- 512 Schrödinger, E. (1926). An Undulatory Theory of the Mechanics of Atoms and Molecules.  
513 *Phys. Rev.*, 28, 1049–1070.
- 514 Skellam, A.J.G. (1951). Random Dispersal in Theoretical Populations. *Biometrika*, 38,  
515 196–218.
- 516 Svenning, J.C. & Sandel, B. (2013). Disequilibrium vegetation dynamics under future climate  
517 change. *Am. J. Bot.*, 100, 1266–1286.
- 518 Terry, J.C.D., O’Sullivan, J.D. & Rossberg, A.G. (2022). Synthesising the multiple impacts  
519 of climatic variability on community responses to climate change. *Ecography*, 2022, e06123.
- 520 Thompson, P.L. & Fronhofer, E.A. (2019). The conflict between adaptation and dispersal  
521 for maintaining biodiversity in changing environments. *Proc. Natl. Acad. Sci. U. S. A.*, 116,  
522 21061–21067.
- 523 Thompson, P.L. & Gonzalez, A. (2017). Dispersal governs the reorganization of ecological  
524 networks under environmental change. *Nat. Ecol. Evol.*, 1, 0162.
- 525 Urban, M.C., Bocedi, G., Hendry, A.P., Mihoub, J.B., Peer, G., Singer, A., et al. (2016).  
526 Improving the forecast for biodiversity under climate change. *Science*, 353, aad8466.
- 527 Urban, M.C., Tewksbury, J.J. & Sheldon, K.S. (2012). On a collision course: competition  
528 and dispersal differences create no-analogue communities and cause extinctions during climate  
529 change. *Proc. R. Soc. B Biol. Sci.*, 279, 2072–2080.
- 530 Yalcin, S. & Leroux, S.J. (2017). Diversity and suitability of existing methods and metrics

531 for quantifying species range shifts. *Glob. Ecol. Biogeogr.*, 26, 609–624.

532 Zhou, Y. & Kot, M. (2011). Discrete-time growth-dispersal models with shifting species  
533 ranges. *Theor. Ecol.*, 4, 13–25.

534 Zurell, D., Jeltsch, F., Dormann, C.F. & Schröder, B. (2009). Static species distribution  
535 models in dynamically changing systems: How good can predictions really be? *Ecography*, 32,  
536 733–744.

537 Zurell, D., Pollock, L.J. & Thuiller, W. (2018). Do joint species distribution models reliably  
538 detect interspecific interactions from co-occurrence data in homogenous environments? *Ecogra-*  
539 *phy*, 41, 1812–1819.

## 540 S1 Mathematical Derivations

541 We develop our analytic theory in two main steps. In the first, we formulate and analyse a  
542 partial differential equation (PDE) model for the distribution of a species' population in a moving  
543 environmental gradient. Several results valid for essentially any environmental performance curve  
544 (EPC) are derived. In the second step, we derive more detailed analytic predictions for a specific  
545 choice of the functional form of the EPC.

### 546 S1.1 Setting

547 We assume that the relevant environmental variable changes linearly along the  $x$  spatial axis,  
548 while being essentially constant in the other spatial directions. We denote by  $b(x, t)$  the time-  
549 dependent ( $t$ ) distribution of a species' population along the  $x$  axis. This can be understood in  
550 two different ways: (1) as a population density (individuals per unit length) or, (2) in the spirit  
551 of metapopulation modelling introduced by Levins (1969), as the density of patches occupied by  
552 the population near  $x$  (occupied patches per unit length). In developing the analytic theory, we  
553 will stick with the first, more conventional interpretation, but the second interpretation may be  
554 more appropriate in certain cases.

555 If the environmental gradient is not too steep, and so the range over which the performance  
556 curve permits a population to grow not too narrow, we can course-grain over individuals (1st  
557 interpretation) or patches (2nd interpretation) and model the dynamics of  $b = b(x, t)$  using the  
558 PDE model:

$$\frac{\partial b}{\partial t} = g(E(x, t))b - cb^2 + D \frac{\partial^2 b}{\partial x^2}. \quad (15)$$

559 The first term on the right-hand-side describes population growth ( $g(E) > 0$ ) or decline ( $g(E) <$   
560  $0$ ) dependent on the environmental variable  $E = E(x, t)$ , the second term intraspecific competi-  
561 tion with competition coefficient  $c$ , and the third term random dispersal of individuals, modelled  
562 as Fick diffusion.

563 We assume that the environmental variable  $E$  changes linearly in space and that the point  
564 in space where  $E = 0$  moves along the  $x$  axis at a constant velocity  $v$ . Then  $E = E_0 + p(x - vt)$

565 with some constant  $E_0$ . We measure lengths in units such that  $p = 1$  and chose the origin of the  
566  $x$  axes such that  $E = 0$  at  $x, t = 0$ , implying  $E_0 = 0$ . This simplifies Eq. (15) to

$$\frac{\partial b}{\partial t} = g(x - vt)b - cb^2 + D \frac{\partial^2 b}{\partial x^2}. \quad (16)$$

567 Next, we introduce a spatial coordinate co-moving with the environmental variable. We define  
568  $y = x - vt$ , so that  $x = y + vt$ . Writing  $b(x, t) = u(x - vt, t) = u(y, t)$ , we obtain for  $u = u(y, t)$   
569 the equation:

$$-v \frac{\partial u}{\partial y} + \frac{\partial u}{\partial t} = g(y)u - cu^2 + D \frac{\partial^2 u}{\partial y^2}. \quad (17)$$

## 570 S1.2 Invasion fitness

571 An ecologically important quantity is the invasion fitness of the species in question, i.e., its long-  
572 term population growth rate at low abundance. This can be obtained by dropping the quadratic  
573 term in Eq. (17) (reflecting an assumption that it is negligible because  $u$  is small, see next section)  
574 and looking for solution of the form  $u(y, t) = e^{\lambda t} u_{\text{inv}}(y)$  (with  $u_{\text{inv}}(y) \rightarrow 0$  as  $y \rightarrow \pm\infty$ ), where  
575  $\lambda$  is the invasion fitness. Mathematically, this leads to the eigenvalue problem

$$\lambda u_{\text{inv}} = g(y)u_{\text{inv}} + v \frac{du_{\text{inv}}}{dy} + D \frac{d^2 u_{\text{inv}}}{dy^2} \quad (18)$$

576 which can be written equivalently in Sturm-Liouville form

$$\lambda e^{vy/D} u_{\text{inv}} = g(y)e^{vy/D} u_{\text{inv}} + D \frac{d}{dy} \left[ e^{vy/D} \frac{du_{\text{inv}}}{dy} \right]. \quad (19)$$

577 By Sturm-Liouville theory (Al-Gwaiz, 2008), there is, up to a constant factor, no more than one  
578 non-negative solution  $u_{\text{inv}}(y) \geq 0$  and corresponding eigenvalue  $\lambda$  solving this problem. Below,  
579 in section S1.4, we shall study this solution for special cases in more detail, assuming that it  
580 exists.

### 581 S1.3 Perturbation theory

582 First, however, we will use perturbation theoretical methods to obtain from solutions of Eq. (18)  
583 approximate solutions of Eq. (17) and insights about the responses of populations to environ-  
584 mental change and management interventions.

585 For simplicity, we consider only equilibrium solutions  $u(y, t) = u(y)$ . Standard procedures  
586 (Chen et al. 1996) can be applied to extend this line of thought to time-dependent solutions.

587 Of particular interest is the situation where the focal species is at risk of extinction because  
588  $\lambda$  is positive but close to zero. To study this case, we assume that  $u$  is everywhere so small that  
589 the quadratic term in Eq. (17) is small compared to the other terms (later results will vindicate  
590 this assumption). We introduce a book-keeping parameter  $\epsilon$  to keep track of the order at which  
591 the small effect of the non-linearity contributes to corrections of the solution (we will set  $\epsilon = 1$   
592 in then end) this. To make the problem accessible to singular perturbation theory, we subtract  
593  $\lambda u$  from the right hand side of Eq. (17) and then add  $\epsilon \lambda u$ , with net zero effect. Then we write  
594 the time-independent form of Eq. (17) as

$$-v \frac{du}{dy} = -\lambda u + g(y)u + D \frac{d^2 u}{dy^2} - \epsilon [cu^2 - \lambda u], \quad (20)$$

595 Following a standard procedure of perturbation theory, we decompose

$$u(y) = u_0(y) + \epsilon u_1(y) + \epsilon^2 u_2(y) + \dots, \quad (21)$$

596 insert this expansion into Eq. (20), and sort terms by powers of  $\epsilon$  (noting  $\epsilon^0 = 1$ ):

$$\begin{aligned} 0 = & \epsilon^0 \left[ v \frac{du_0}{dy} - \lambda u_0 + g(y)u_0 + D \frac{d^2 u_0}{dy^2} \right] + \\ & \epsilon^1 \left[ v \frac{du_1}{dy} - \lambda u_1 + g(y)u_1 + D \frac{d^2 u_1}{dy^2} - cu_0^2 + \lambda u_0 \right] + \\ & \text{(terms of order } \epsilon^2 \text{ and higher)}. \end{aligned} \quad (22)$$

597 This equation is now solved at each order in  $\epsilon$  separately. We have constructed this expansion  
598 such that at order  $\epsilon^0$  the general solution is  $u_0(y) = U u_{\text{inv}}(y)$ , with the constant  $U > 0$  to be  
599 determined. Solving the equation for  $u_1$  at order  $\epsilon$  is not always possible, because the linear

600 operator  $L$  defined for arbitrary bounded and smooth functions  $f(y)$  as

$$Lf = v \frac{df}{dy} - \lambda f + g(y)f + D \frac{d^2f}{dy^2} \quad (23)$$

601 has a non-trivial null space  $f = u_{\text{inf}}$  and is therefore not invertible. According to Fredholm theory  
 602 (Zeidler 1995), solvability requires that for functions  $u^+(y)$  in the null space of the adjoint  $L^+$   
 603 of operator  $L$ , the condition

$$\int_{-\infty}^{\infty} u^+(y) [-cu_0(y)^2 + \lambda u_0(y)] dy = 0 \quad (24)$$

604 is satisfied. By standard arguments (Zeidler 1995), the adjoint operator  $L^+$  is obtained by  
 605 flipping the sign of all  $y$ -derivatives  $d/dy$  in Eq. (23), giving

$$L^+f = -v \frac{df}{dy} - \lambda f + g(y)f + D \frac{d^2f}{dy^2}. \quad (25)$$

606 The null space of  $L^+$ , that is, functions  $u^+$  satisfying  $L^+u^+ = 0$ , are, up to a constant factor, of  
 607 the form

$$u^+(y) = e^{vy/D} u_{\text{inv}}(y), \quad (26)$$

608 as is verified by direct evaluation. Ecologically,  $u^+(y)$  provides, up to a constant factor, the  
 609 reproductive value of individuals at location  $y$ . With this in mind, the factor  $e^{vy/D}$  in Eq. (26)  
 610 is ecologically plausible: as tendency, it assigns to individuals ahead in the range shift a higher  
 611 reproductive value than to those lagging behind.

612 Putting Eq. (26) and  $u_0 = U u_{\text{inv}}$  into the solvability condition Eq. (24), the condition can be  
 613 evaluated further, yielding the hitherto unspecified constant

$$U = \frac{\lambda \int_{-\infty}^{\infty} e^{vy/D} u_{\text{inv}}^2 dy}{c \int_{-\infty}^{\infty} e^{vy/D} u_{\text{inv}}^3 dy}. \quad (27)$$

614 Since  $u_{\text{inv}}$  enters quadratically in the numerator and to third order in the denominator of  $U$ ,  
 615 Eq. (27) implies that  $u_0 = U u_{\text{inv}}$  scales as  $\lambda/c$ , i.e. the magnitude of  $u_{\text{inv}}$  cancels out. It follows

616 that, in order to balance contributions from  $u_0$  in  $\epsilon^1$  term in Eq. (22), the term  $g(y)u_1$  must  
617 scale as  $\lambda u_0$ . We can therefore estimate that the contribution  $u_1$  to  $u$  is by a factor of the  
618 order of magnitude of  $\lambda/\max_y g(y)$  smaller than the contribution  $u_0$ . As  $\lambda$  approaches zero from  
619 above, the term  $\epsilon u_1(u)$  in Eq. (21) (with  $\epsilon$  set to 1) therefore becomes negligible compared to  
620 the leading term. One can argue similarity for the higher-order corrections. Hence, populations  
621 in equilibrium but close to extirpation are approximately distributed with a density

$$u(y) \approx U u_{\text{inv}}(y), \quad (28)$$

622 with  $U$  given by Eq. (27). (In the study of non-linear dissipative systems, Eq. (28) is known  
623 as the *weakly nonlinear approximation* (Stephenson & Wollkind 1995) of the equilibrium of  
624 Eq. (17).) This result establishes how the solution of the eigenvalue problem Eq. (18) essentially  
625 determines the equilibrium solution of the non-linear problem Eq. (17), especially for species  
626 close to extirpation.

#### 627 **S1.4 Population fitness under climate change**

628 We now study Eq. (18) in more detail. The equation can be simplified by writing  $u_{\text{inv}}(y)$  as  
629  $u_{\text{inv}}(y) = e^{-vy/(2D)}\psi(y)$  with a new unknown function  $\psi(y)$ . Putting this into Eq. (18) yields  
630 an eigenvalue problem involving  $\psi = \psi(y)$ :

$$\left(\lambda + \frac{v^2}{4D}\right)\psi = g(y)\psi + D\frac{d^2\psi}{dy^2}. \quad (29)$$

631 This formulation of the problem has the advantage that it depends on the velocity  $v$  of envi-  
632 ronmental change only on the left-hand side. To understand the significance of this result, let  
633 us assume that the species in question had been studied before the onset of climate change, i.e.  
634 for  $v = 0$ . In this case  $u_{\text{inv}}(y) = \psi(y)$  and, by Eq. (28), this function is for vulnerable species  
635 approximated by the observed distribution profile before environmental change. We denote the  
636 invasion fitness of the species for  $v = 0$  by  $\lambda_0$ . This quantity might also have been determined  
637 before the onset of environmental change, for example by measuring harvesting resistance (Ross-  
638 berg 2013) or similar quantities. Assuming that the dispersal constant  $D$  is known as well, the

639 fate of the population under environmental change ( $v \neq 0$ ) can now be predicted.

640 Specifically, since  $\psi(y)$  remains unchanged, invasion fitness will decline to:

$$\lambda = \lambda_0 - \frac{v^2}{4D} \quad (30)$$

641 by Eq. (29). Remarkably, this decline is entirely independent of the form of the environmental  
642 performance curve. In particular, it does not depend on whether  $g(y)$  is left- or right-skewed.

643 When environmental change is too fast ( $|v| > 2\sqrt{D\lambda_0}$ ),  $\lambda$  becomes negative and the species goes  
644 extinct.

645 For species that survive environmental change, the predicted population density is

$$u(y) \approx U e^{-vy/(2D)} \psi(y), \quad (31)$$

646 with

$$U = \frac{\lambda \int_{-\infty}^{\infty} \psi^2 dy}{c \int_{-\infty}^{\infty} e^{-vy/(2D)} \psi^3 dy}. \quad (32)$$

647 The factor  $e^{-vy/(2D)}$  in Eq. (31) shifts the value of  $y$  where  $u(y)$  is largest along the  $y$  axis,  
648 causing a lag between the actual distribution and the distribution one would expect in a static  
649 environment. The factor  $e^{-vy/(2D)}$  in the denominator in Eq. (32) corrects an artefact in Eq. (31)  
650 that arises when the maximum performance  $g(y)$  and so the maximum of  $\psi(y)$  are not close to  
651  $y = 0$ . It has otherwise little effect.

## 652 **S1.5 Optimising the location of conservation interventions**

653 Given the detrimental effect of environmental change, conservation ecologists have considered  
654 how a species' population might best be supported to prevent extirpation during range shift.

655 One management option is to support endangered populations by providing, e.g., additional  
656 food, shelter or nesting opportunities, suppressing competitors or natural enemies, or in case of  
657 exploited species, through targeted reductions in exploitation rates. A question that naturally  
658 arises is: where in a species range (between the leading edge and the trailing edge of the range)



659 would such interventions be most effective? The first impulse might be, e.g., to support species  
660 in the leading edge of their shifting populations to accelerate the range shift. Interestingly, our  
661 theory suggests this isn't always the best choice.

662 For simplicity, we assume that the conservation measures are introduced at a particular  
663 point  $y_{\text{cons}}$  along the  $y$ -axis (i.e the reference frame that moves with the climate) and reasonably  
664 represented in our model by modifying the environmental performance function  $g(y)$  to  $g(y) +$   
665  $g_{\text{cons}}\delta(y - y_{\text{cons}})$ . Here a constant  $g_{\text{cons}} > 0$  quantifies the strength (and sign) of the intervention  
666 or perturbation and  $\delta(y - y_{\text{cons}})$  denotes Dirac's delta-functional, a generalised function that  
667 represents a sharp peak that is localised to be non-zero only at  $y = y_{\text{cons}}$  and is considered to  
668 have a 'height' such that  $\int \delta(y - y_{\text{cons}})dy = 1$ .

669 We can evaluate the effect of this intervention perturbatively along the lines of the perturba-  
670 tion scheme above (S1.3). For this, we multiply the added term  $g_{\text{cons}}\delta(y - y_{\text{cons}})u(y)$  with the  
671 book-keeping parameter  $\epsilon$  and include it amongst the "small" terms on the right in Eq. (20).  
672 The calculation then progresses as before. It leads to a modified result for the population scaling  
673 factor

$$U = \frac{\lambda \int_{-\infty}^{\infty} \psi^2 dy + g_{\text{cons}}\psi^2(y_{\text{cons}})}{c \int_{-\infty}^{\infty} e^{-vy/(2D)} \psi^3 dy}. \quad (33)$$

674 Thus, the effective invasion fitness resulting from these conservation measures increases to

$$\lambda_{\text{cons}} \approx \lambda_0 - \frac{v^2}{4D} + \frac{g_{\text{cons}}\psi^2(y_{\text{cons}})}{\int \psi^2 dy}. \quad (34)$$

675 Hence, the conservation measures may indeed prevent extirpation of a population. Crucially,  
676 they are, by Eq. (34), most effective neither in the leading nor the trailing edge of the migrating  
677 population, but at the point where  $\psi(y)$  is largest. The mathematics underlying this result is  
678 closely related to that underlying the well-known sensitivity analyses for matrix models of age- or  
679 stage-structured population models (Caswell 2019). In the latter case, sensitivity is highest for  
680 matrix elements  $(i, j)$  for which the product of the reproductive value of stage  $i$  and numerical  
681 population size of stage  $j$  is largest. In our setting, the corresponding product evaluates to  
682  $\psi^2(y_{\text{cons}})$ . This explains why it is neither efficient to support range-shifting populations at their

683 leading edges nor at their trailing edges: the reproductive value of individuals at both ends is  
684 small and the density of surviving individuals small as well, which is why conservation measures  
685 aimed at the edges have little impact on the fate of the species as a whole. Remarkably, this  
686 rule is independent of the rate or direction of climate change and independent of the actual  
687 distribution of the migrating population.

## 688 **S1.6 Constraints on parameters for the Morse EPC model**

689 Similar to the Schrödinger Equation (7), our equation for  $\psi(y)$  does not have ecologically valid  
690 solution for all parameter combinations. Here we discuss these limits on parameters in terms of  
691 the linear growth rate for  $v = 0$ , as given by Equation (10),

$$\lambda_0 = R_{max} - \frac{\sqrt{DR_{max}}}{w} + \frac{a^2 D}{4}. \quad (35)$$

692 This expression attains a minimum in terms of  $D$  at  $D = 4R_{max}a^{-4}w^{-2}$ . At this point  $\lambda =$   
693  $R_{max}(1 - a^{-2}w^{-2})$ . This value of  $\lambda_0$  is the one that  $g_{Mor}(E)$  approaches for large values of  $aE$ .  
694 It is negative by the condition  $|aw| < 1$  that we imposed to assure that  $g_{Mor}(E)$  declines to  
695 negative values for large  $|E|$ .

696 For  $D = 4R_{max}a^{-4}w^{-2}$ , the solution  $\psi(y)$  of Eq. (3) does not decline to zero for either large  
697 positive or large negative  $y$ ; rather, it describes the temporal decline of a population over a wide  
698 range in  $y$ . In the quantum physical analogue, this corresponds to a situations where, due to the  
699 quantum mechanical uncertainty principle, a potential well becomes unable to bind a quantum  
700 particles when it is too narrow and shallow. For values of  $D$  beyond this point Eq. (3) has no  
701 bounded solutions and hence cannot describe a growth from small abundance. In our analyses,  
702 we therefore always assume

$$D < \frac{4R_{max}}{a^4 w^2}. \quad (36)$$

703 This constraint on  $D$  is a model artefact linked to the fact that  $g_{Mor}(E)$  approaches a constant  
704 value for large  $aE$ . Ecologically more realistic would be EPCs  $g(E)$  that always exhibit a steady  
705 decline with increasing  $|E|$  for both large positive and large negative  $E$ , in which case this

706 constraint does not arise. For values of  $D$  well below the bound given by Eq. (36), however, this  
707 artefact of  $g_{Mor}(E)$  plays no role.

## 708 **Additional References**

709 Al-Gwaiz, M.A. (2008). Sturm-Liouville Theory and its Applications. Springer Undergraduate  
710 Mathematics Series. Springer-Verlag, London.

711 Chen, L.-Y., Goldenfeld, N. & Oono, Y. (1996). Renormalization group and singular pertur-  
712 bations: Multiple scales, boundary layers, and reductive perturbation theory. Phys. Rev. E, 54,  
713 376–394.

714 Rossberg, A.G. (2013). Food Webs and Biodiversity: Foundations, Models, Data. John  
715 Wiley & Sons Ltd, Oxford.

716 Stephenson, L.E. & Wollkind, D.J. (1995). Weakly nonlinear stability analyses of one-  
717 dimensional Turing pattern formation in activator-inhibitor/immobilizer model systems. J.  
718 Math. Biol., 33.

719 Zeidler, E. (1995). Applied Functional Analysis. Applied Mathematical Sciences. Springer  
720 New York, New York, NY.

721 **S2 Mathematica Supplement: Solving Schrödinger equa-**  
722 **tions for particular cases**

723 The remainder of the mathematical results that stem from the use of the Schrödinger equation  
724 we present as an annotated and evaluated Mathematica notebook .pdf. Expressions used in the  
725 main text are highlighted with a light blue background. It is also available as `Mathematica.nb`  
726 in the code repository. While Mathematica is licensed software, this document can also ‘read’  
727 using the free Wolfram player (<https://www.wolfram.com/player/>).

728 **S3 Model Specification**

729 Separate .pdf file

730 **S4 Quantitative Match**

731 Separate .pdf file
